# Supplementary material
Source: ML conference proceedings conference paper supplement (https://proceedings.mlr.press/v119/si20a.html)
Supplement: Supplementary file 1 [file si20a-supp.pdf]

# Supplementary material to the paper "Distributional Robust Policy Evaluation and Learning in Offline Contextual Bandits"

## Appendix A Proofs

### Appendix A.1 Auxiliary Results

In this section, we give all of the auxiliary results used in the proofs.

**Theorem A1** (Hoeffding's inequality, Theorem 2.8 in [3]). *Let  $X_1, \dots, X_n$  be independent random variables such that  $X_i$  takes its values in  $[a_i, b_i]$  almost surely for all  $i < n$ . Let*

$$S = \sum_{i=1}^n (X_i - \mathbf{E}X_i).$$

Then for every  $t > 0$ ,

$$\mathbf{P}(|S| > t) \leq \exp\left(-\frac{2t^2}{\sum_{i=1}^n (b_i - a_i)^2}\right).$$

**Theorem A2** (Functional central limit theorem, Corollary 7.17 in [1]). *Let  $S$  be a compact subspace of  $\mathbf{R}^d$  and  $\mathcal{C}(S)$  be the space of continuous bounded random functions on  $S$  equipped with the sup-norm. Let  $\{X_n\}_{n=1}^\infty$  be a sequence of centered i.i.d.  $\mathcal{C}(S)$ -valued random functions such that  $\mathbf{E}X_n^2(s) < \infty$  for some  $s \in S$ . Suppose there exists a constant  $M$  such that*

$$|X_1(s) - X_2(t)| \leq M \|s - t\| \text{ almost surely,}$$

for all  $s, t \in S$ . Then,

$$\frac{1}{\sqrt{n}} \sum_{i=1}^n X_n \Rightarrow Y,$$

where  $Y$  is a Gaussian process on  $\mathcal{C}(S)$ .

**Definition 1** (Directional differentiability, Gâteaux directional differentiability and Hadamard directional differentiability). *Let  $B_1$  and  $B_2$  be Banach spaces and  $G : B_1 \rightarrow B_2$  be a mapping. It is*

said that  $G$  is directionally differentiable at a considered point  $\mu \in B_1$  if the limits

$$G'_\mu(d) = \lim_{t \downarrow 0} \frac{G(\mu + td) - G(\mu)}{t}$$

exists for all  $d \in B_1$ .

Furthermore, it is said that  $G$  is Gâteaux directionally differentiable at  $\mu$  if the directional derivative  $G'_\mu(d)$  exists for all  $d \in B_1$  and  $G'_\mu(d)$  is linear and continuous in  $d$ . For ease of notation, we also denote  $D_\mu(\mu_0)$  be the operator  $G'_{\mu_0}(\cdot)$ .

Finally, it is said that  $G$  is Hadamard directionally differentiable at  $\mu$  if the directional derivative  $G'_\mu(d)$  exists for all  $d \in B_1$  and

$$G'_\mu(d) = \lim_{\substack{t \downarrow 0 \\ d' \rightarrow d}} \frac{G(\mu + td') - G(\mu)}{t}.$$

**Theorem A3** (Danskin theorem, Theorem 4.13 in [2]). *Let  $\Theta \in \mathbf{R}^d$  be a nonempty compact set and  $B$  be a Banach space. Suppose the mapping  $G : B \times \Theta \rightarrow \mathbf{R}$  satisfies that  $G(\mu, \theta)$  and  $D_\mu(\mu, \theta)$  are continuous on  $O_{\mu_0} \times \Theta$ , where  $O_{\mu_0} \subset B$  is a neighborhood around  $\mu_0$ . Let  $\phi : B \rightarrow \mathbf{R}$  be the inf-functional  $\phi(\mu) = \inf_{\theta \in \Theta} G(\mu, \theta)$  and  $\bar{\Theta}(\mu) = \arg \max_{\theta \in \Theta} G(\mu, \theta)$ . Then, the functional  $\phi$  is directionally differentiable at  $\mu_0$  and*

$$G'_{\mu_0}(d) = \inf_{\theta \in \bar{\Theta}(\mu_0)} D_\mu(\mu_0, \theta) d.$$

**Theorem A4** (Delta theorem, Theorem 7.59 in [6]). *Let  $B_1$  and  $B_2$  be Banach spaces, equipped with their Borel  $\sigma$ -algebras,  $Y_N$  be a sequence of random elements of  $B_1$ ,  $G : B_1 \rightarrow B_2$  be a mapping, and  $\tau_N$  be a sequence of positive numbers tending to infinity as  $N \rightarrow \infty$ . Suppose that the space  $B_1$  is separable, the mapping  $G$  is Hadamard directionally differentiable at a point  $\mu \in B_1$ , and the sequence  $X_N = \tau_N(Y_N - \mu)$  converges in distribution to a random element  $Y$  of  $B_1$ . Then,*

$$\tau_N(G(Y_N) - G(\mu)) \Rightarrow G'_\mu(Y) \text{ in distribution,}$$

and

$$\tau_N(G(Y_N) - G(\mu)) = G'_\mu(X_N) + o_p(1).$$

**Proposition A1** (Proposition 7.57 in [6]). *Let  $B_1$  and  $B_2$  be Banach spaces,  $G : B_1 \rightarrow B_2$ , and  $\mu \in B_1$ . Then the following hold: (i) If  $G(\cdot)$  is Hadamard directionally differentiable at  $\mu$ , then the directional derivative  $G'_\mu(\cdot)$  is continuous. (ii) If  $G(\cdot)$  is Lipschitz continuous in a neighborhood of  $\mu$  and directionally differentiable at  $\mu$ , then  $G(\cdot)$  is Hadamard directionally differentiable at  $\mu$ .*

## Appendix A.2 Proof of Lemma 3.3

*Proof of Lemma 3.3.* The closed form expression of  $\frac{\partial}{\partial \alpha} \hat{\phi}_n(\pi, \alpha)$  and  $\frac{\partial^2}{\partial \alpha^2} \hat{\phi}_n(\pi, \alpha)$  follows from elementary algebra. By the Cauchy Schwartz's inequality, we have

$$\left( \sum_{i=1}^n Y_i(A_i) W_i(\pi, \alpha) \right)^2 \leq n \hat{W}_n(\pi, \alpha) \sum_{i=1}^n Y_i^2(A_i) W_i(\pi, \alpha)$$

Therefore, it follows that  $\frac{\partial^2}{\partial \alpha^2} \hat{\phi}_n(\pi, \alpha) \leq 0$ . Note that the Cauchy Schwartz's inequality is actually an equality if and only if

$$Y_i^2(A_i) W_i(\pi, \alpha) = c W_i(\pi, \alpha) \quad \text{if} \quad W_i(\pi, \alpha) \neq 0$$

for some constant  $c$  independent of  $i$ . Since the above condition is violated if  $\{Y_i(A_i) \mathbf{1}\{\pi(X_i) = A_i\}\}_{i=1}^N$  has at least two different non-zero values, we have in this case  $\hat{\phi}_n(\pi, \alpha)$  is strictly-concave in  $\alpha$ .  $\square$

## Appendix A.3 Proof of Theorem 3.4

We first give the upper and lower bound for  $\alpha^*$  and in Lemmas A1 and A3.

**Lemma A1** (Upper bound of  $\alpha^*$ ). *Suppose that Assumption 1 is imposed, we have the optimal dual solution  $\alpha^* \leq \bar{\alpha} = M/\delta$ .*

*Proof.* Proof First note that  $\inf_{\mathbf{P} \in \mathcal{U}_{\mathbf{P}_0}(\delta)} \mathbf{E}_{\mathbf{P}} [Y(\pi(X))] \geq \min_{i \in [n]} (Y_i) \geq 0$  and

$$-\alpha \log \mathbf{E}_{\mathbf{P}_0} [\exp(-Y(\pi(X)))/\alpha] - \alpha \delta \leq M - \alpha \delta.$$

$M - \alpha \delta \geq 0$  gives the upper bound  $\alpha^* \leq \bar{\alpha} = M/\delta$ .  $\square$

To prove the lower bound of  $\alpha^*$ , we need the following technical lemma.

**Lemma A2.** *For  $c > 0$  and  $c \exp(b) < 1/e$ , the smallest root of equation  $x \log(x) + bx + c = 0$  is*

$$x^* = -\frac{c}{W_{-1}(-c \exp(b))},$$

where  $W_{-1}(z)$  is the root of the equation for  $w$  in  $w \exp(w) = z$  with  $z < -1$ . Furthermore, we have

$$x^* \in \left( \frac{c(-\log c - b - 1)}{2((\log(c) + b + 1)^2 + 1)}, c \right).$$

*Proof.* Let  $f(x) = x \log(x) + bx + c$  and  $x = -c/w$  for  $w < 0$ . Then,

$$f(x) = 0$$

$$\begin{aligned}
&\Leftrightarrow (-c/w) \log(-c/w) + b(-c/w) + c = 0 \\
&\Leftrightarrow w = \log(-c/w) + b \\
&\Leftrightarrow w \exp(w) = -c \exp(b).
\end{aligned}$$

Since  $x = -c/w$  is one-to-one mapping, we have roots of  $f(x) = 0$  have one-to-one correspondence with roots of  $w \exp(w) = -c \exp(b)$ . Note that when  $-c \exp(b) \in (-1/e, 0)$ ,  $w \exp(w) = -c \exp(b)$  has 2 roots, one is in  $(-1, 0)$  and the other one is in  $(-1, +\infty)$ . Therefore, the small root of  $f(x) = 0$  is of the form

$$x^* = -\frac{c}{W_{-1}(-c \exp(b))}.$$

[4] shows that

$$-1 - \sqrt{2u} - u < W_{-1}(-\exp(-u - 1)) < -1, \text{ for } u > 0.$$

Notice that  $u + 1 - \sqrt{2u} \geq \frac{1}{2}u$ , we have

$$\frac{cu}{2(u^2 + 1)} < -c/W_{-1}(-\exp(-u - 1)) < c.$$

Let  $u = -\log c - b - 1$ , we have that

$$x^* \in \left( \frac{c(-\log c - b - 1)}{2((\log(c) + b + 1)^2 + 1)}, c \right).$$

□

**Lemma A3** (Lower bound of  $\alpha^*$ ). *Suppose that Assumption 1 is imposed, we have*

$$\alpha^* \geq \underline{\alpha} = \frac{\bar{b}^{-1} \exp(-\delta - 1) (\log(\bar{b}) - \log(\underline{b}))}{2((\log(\underline{b}) - \log(\bar{b}))^2 + 1)}. \quad (\text{A.1})$$

*Proof.* Denote the density of  $Y(\pi(X))$  by  $f_\pi$ . It is easy to see that  $\bar{b} \geq f_\pi(y) \geq \underline{b}$  for any  $\pi \in \Pi$  and any  $y \in [0, M]$ . First notice that

$$\alpha^* = \arg \max_{\alpha \geq 0} \{-\alpha \log \mathbf{E}_{\mathbf{P}_0} [\exp(-Y(\pi(X))/\alpha)] - \alpha\delta\} = \arg \min_{\alpha \geq 0} \{\alpha \log \mathbf{E}_{\mathbf{P}_0} [\exp(-Y(\pi(X))/\alpha)] + \alpha\delta\}.$$

Then, we have

$$\begin{aligned}
\alpha \log \mathbf{E}_{\mathbf{P}_0} [\exp(-Y(\pi(X))/\alpha)] + \alpha\delta &= \alpha \log \left[ \int_0^M \exp(-y/\alpha) f_\pi(y) dy \right] + \alpha\delta \\
&\leq \alpha \log [\bar{b}(\alpha - \exp(-M/\alpha)\alpha)] + \alpha\delta \\
&\leq \alpha \log(\alpha) + \alpha(\delta + \log(\bar{b})).
\end{aligned}$$

Therefore, we have

$$\min_{\alpha \geq 0} \alpha \{ \log \mathbf{E}_{\mathbf{P}_0} [\exp(-Y(\pi(X)/\alpha))] + \alpha \delta \} \leq \min_{\alpha \geq 0} \{ \alpha \log(\alpha) + \alpha(\delta + \log(\bar{b})) \} = -\bar{b}^{-1} \exp(-\delta - 1).$$

On the other hand, We have

$$\begin{aligned} & \alpha \log \mathbf{E}_{\mathbf{P}_0} [\exp(-Y(\pi(X))/\alpha)] + \alpha \delta \\ &= \alpha \log \left[ \int_0^M \exp(-y/\alpha) (f_\pi(y) - \underline{b} + \underline{b}) dy \right] + \alpha \delta \\ &\geq \alpha \log [\exp(-M/\alpha) (1 - \underline{b}M) + \underline{b}(\alpha - \exp(-M/\alpha) \alpha)] + \alpha \delta \\ &= \alpha \log [\exp(-M/\alpha) (1 - \underline{b}M - \underline{b}\alpha) + \alpha \underline{b}] + \alpha \delta \end{aligned}$$

Since  $2\underline{b}M \leq 1$ , we have when  $\alpha \leq \frac{1}{2\underline{b}}$ ,  $1 - \underline{b}M - \underline{b}\alpha \geq 0$  and thus

$$\alpha \log \mathbf{E}_{\mathbf{P}_0} [\exp(-Y(\pi(X))/\alpha)] + \alpha \delta \geq \alpha \log(\alpha) + \alpha(\delta + \log(\underline{b})).$$

Consider the function  $f(\alpha) = \alpha \log(\alpha) + \alpha(\delta + \log(\underline{b}))$ .  $f(\alpha)$  is decreasing when  $\alpha \in [0, (\underline{b})^{-1} \exp(-\delta - 1)]$ . Notice that

$$\bar{b}^{-1} \exp(-\delta - 1) \exp(\delta + \log(\underline{b})) \leq 1/e.$$

By applying Lemma A2, we have the smallest root of  $f(\alpha) = -\bar{b}^{-1} \exp(-\delta - 1)$ ,  $\alpha_0$  is in

$$\alpha_0 \in \left( \frac{\bar{b}^{-1} \exp(-\delta - 1) (\log(\bar{b}) - \log(\underline{b}))}{2 \left( (\log(\underline{b}) - \log(\bar{b}))^2 + 1 \right)}, \bar{b}^{-1} \exp(-\delta - 1) \right).$$

Notice that

$$\frac{\bar{b}^{-1} \exp(-\delta - 1) (\log(\bar{b}) - \log(\underline{b}))}{2 \left( (\log(\bar{b}) - \log(\underline{b}))^2 + 1 \right)} < \frac{1}{2\underline{b}},$$

and thus

$$\begin{aligned} & \alpha \log \mathbf{E}_{\mathbf{P}_0} [\exp(-Y(\pi(X))/\alpha)] + \alpha \delta > \min_{\alpha \geq 0} \alpha \{ \log \mathbf{E}_{\mathbf{P}_0} [\exp(-Y(\pi(X))/\alpha)] + \alpha \delta \} \\ & \text{for } \alpha \in \left[ 0, \frac{\bar{b}^{-1} \exp(-\delta - 1) (\log(\bar{b}) - \log(\underline{b}))}{2 \left( (\log(\bar{b}) - \log(\underline{b}))^2 + 1 \right)} \right), \end{aligned}$$

which concludes (A.1). □

Now we are ready to show the proof of Theorem 3.4.

*Proof of Theorem 3.4.* Notice that

$$\sqrt{n} \left( \hat{W}_n(\pi, \alpha) - \mathbf{E}[W_i(\pi, \alpha)] \right) \Rightarrow Z(\alpha),$$

where

$$Z(\alpha) \sim N(0, \mathbf{Var}[W_i(\pi, \alpha)]).$$

Since  $W_i(\pi, \alpha)$  is Lipschitz continuous if  $\alpha \in [\underline{\alpha}/2, 2\bar{\alpha}]$ . We have  $W_i(\pi, \alpha)$  is a  $P$ -Donsker class (see, for example, Corollary 7.17 in [1] and Chapter 19 in [7]). Therefore,

$$\sqrt{n} \left( \hat{W}_n(\pi, \cdot) - \mathbf{E}[W_i(\pi, \cdot)] \right) \Rightarrow Z(\cdot),$$

in a Banach space  $\mathcal{C}([\underline{\alpha}/2, 2\bar{\alpha}])$  of continuous functions  $\psi : [\underline{\alpha}/2, 2\bar{\alpha}] \rightarrow \mathbf{R}$  equipped with the sup-norm  $\|\psi\| = \sup_{\alpha \in [\underline{\alpha}/2, 2\bar{\alpha}]} \psi(\alpha)$ .  $Z$  is a random element in  $\mathcal{C}([\underline{\alpha}/2, 2\bar{\alpha}])$ .

Define the functionals

$$G(\psi, \alpha) = \alpha \log(\psi(\alpha)) + \alpha\delta, \text{ and } V(\psi) = \inf_{\alpha \in [\underline{\alpha}/2, 2\bar{\alpha}]} G(\psi, \alpha),$$

for  $\psi > 0$ . By the Danskin theorem (Theorem 4.13 in [2]),  $V(\cdot)$  is directionally differentiable at any  $\mu \in \mathcal{C}([\underline{\alpha}/2, 2\bar{\alpha}])$  with  $\mu > 0$  and

$$V'_\mu(\nu) = \inf_{\alpha \in \bar{X}(\mu)} \alpha(1/\mu(\alpha))\nu(\alpha), \quad \forall \nu \in \mathcal{C}([\underline{\alpha}/2, 2\bar{\alpha}]),$$

where  $\bar{X}(\mu) = \arg \min_{\alpha \in [\underline{\alpha}/2, 2\bar{\alpha}]} \alpha \log(\mu(\alpha)) + \alpha\delta$  and  $V'_\mu(\nu)$  is the directional derivative of  $V(\cdot)$  at  $\mu$  in the direction of  $\nu$ . On the other hand,  $V(\psi)$  is Lipschitz continuous if  $\psi(\cdot)$  is bounded away from zero. Notice that

$$\mathbf{E}[W_i(\pi, \alpha)] = \mathbf{E}[\exp(-Y(\pi(x))/\alpha)] \geq \exp(-2M/\underline{\alpha}). \quad (\text{A.2})$$

Therefore,  $V(\cdot)$  is Hadamard directionally differentiable at  $\mu = \mathbf{E}[W_i(\pi, \cdot)]$  (see, for example, Proposition 7.57 in [6]). By the Delta theorem (Theorem 7.59 in [6]), we have

$$\sqrt{n} \left( V(\hat{W}_n(\pi, \cdot)) - V(\mathbf{E}[W_i(\pi, \cdot)]) \right) \Rightarrow V'_{\mathbf{E}[W_i(\pi, \cdot)]}(Z).$$

Furthermore, we know that  $\log(\mathbf{E}(\exp(-\beta Y)))$  is strictly convex w.r.t  $\beta$  given  $\mathbf{Var}(Y) > 0$  and  $xf(1/x)$  is strictly convex if  $f(x)$  is strictly convex. Therefore,  $\alpha \log(\mathbf{E}[W_i(\pi, \alpha)]) + \alpha\delta$  is strictly convex for  $\alpha > 0$  and thus

$$V'_{\mathbf{E}[W_i(\pi, \cdot)]}(Z) = \alpha^* (1/\mathbf{E}[W_i(\pi, \alpha^*)]) Z(\alpha^*) \stackrel{d}{=} N\left(0, (\alpha^*)^2 \left( \mathbf{E}[W_i(\pi, \alpha^*)]^{-2} \mathbf{Var}[W_i(\pi, \alpha^*)] \right)\right).$$

By Lemma 3.1, we have that

$$\hat{Q}_{\text{DRO}}(\pi) = - \inf_{\alpha \geq 0} \left( \alpha \log \left( \hat{W}_n(\pi, \alpha) \right) + \alpha \delta \right),$$

and

$$Q_{\text{DRO}}(\pi) = - \inf_{\alpha \geq 0} \left( \alpha \log \left( \mathbf{E}[W_i(\pi, \alpha)] \right) + \alpha \delta \right) = -V(\mathbf{E}[W_i(\pi, \alpha)]).$$

We remain to show  $\mathbf{P}(\hat{Q}_{\text{DRO}}(\pi) \neq -V(\hat{W}_n(\pi, \alpha))) \rightarrow 0$ , as  $n \rightarrow \infty$ . Since Donsker classes are Glivenko–Cantelli classes, we have the uniform convergence

$$\sup_{\alpha \in [\underline{\alpha}/2, 2\bar{\alpha})} \left| \hat{W}_n(\pi, \alpha) - \mathbf{E}[W_i(\pi, \alpha)] \right| \rightarrow 0 \text{ a.s..}$$

Therefore, we further have

$$\sup_{\alpha \in [\underline{\alpha}/2, 2\bar{\alpha})} \left| \left( \alpha \log \left( \hat{W}_n(\pi, \alpha) \right) + \alpha \delta \right) - \left( \alpha \log \left( \mathbf{E}[W_i(\pi, \alpha)] \right) + \alpha \delta \right) \right| \rightarrow 0 \text{ a.s.}$$

given  $\mathbf{E}[W_i(\pi, \alpha)]$  is bounded away from zero in (A.2). Let

$$\epsilon = \min \{ \underline{\alpha}/2 \log \left( \mathbf{E}[W_i(\pi, \underline{\alpha}/2)] \right) + \underline{\alpha}\delta/2, 2\bar{\alpha} \log \left( \mathbf{E}[W_i(\pi, 2\bar{\alpha})] \right) + 2\bar{\alpha}\delta \} - (\alpha^* \log \left( \mathbf{E}[W_i(\pi, \alpha^*)] \right) + \alpha^*\delta) > 0.$$

Then, given the event

$$\left\{ \sup_{\alpha \in [\underline{\alpha}/2, 2\bar{\alpha})} \left| \left( \alpha \log \left( \hat{W}_n(\pi, \alpha) \right) + \alpha \delta \right) - \left( \alpha \log \left( \mathbf{E}[W_i(\pi, \alpha)] \right) + \alpha \delta \right) \right| < \epsilon/2 \right\},$$

we have

$$\alpha^* \log \left( \hat{W}_n(\pi, \alpha) \right) + \alpha^*\delta < \min \left\{ \underline{\alpha}/2 \log \left( \hat{W}_n(\pi, \underline{\alpha}/2) \right) + \underline{\alpha}\delta/2, 2\bar{\alpha} \log \left( \hat{W}_n(\pi, 2\bar{\alpha}) \right) + 2\bar{\alpha}\delta \right\},$$

which means  $\hat{Q}_{\text{DRO}}(\pi) = -V(\hat{W}_n(\pi, \alpha))$  by the convexity of  $\alpha \log \left( \hat{W}_n(\pi, \alpha) \right) + \alpha \delta$ .

Finally, we complete the proof by Slutsky's lemma:

$$\begin{aligned} \sqrt{n} \left( \hat{Q}_{\text{DRO}}(\pi) - Q_{\text{DRO}}(\pi) \right) &= \sqrt{n} \left( \hat{Q}_{\text{DRO}}(\pi) + V(\hat{W}_n(\pi, \alpha)) \right) + \sqrt{n} \left( V(\mathbf{E}[W_i(\pi, \alpha)]) - V(\hat{W}_n(\pi, \alpha)) \right) \\ &\Rightarrow 0 + N \left( 0, (\alpha^*)^2 \left( \mathbf{E}[W_i(\pi, \alpha^*)]^{-2} \mathbf{Var}[W_i(\pi, \alpha^*)] \right) \right) \\ &= N \left( 0, (\alpha^*)^2 \left( \mathbf{E}[W_i(\pi, \alpha^*)]^{-2} \mathbf{Var}[W_i(\pi, \alpha^*)] \right) \right). \end{aligned}$$

□

## Appendix A.4 Proof of lemma 3.5

We use a similar technique as presented in [5, Lemma 5].

Consider the function  $f(\beta) = \log \mathbf{E}_{\mathbf{P}_0} [\exp(-\beta Y(\pi(X)))]$ . The following equalities hold

$$f(0) = 0, f'(0) = -\mathbf{E}_{\mathbf{P}_0} [Y(\pi(X))] \text{ and, } f''(0) = \mathbf{Var} (Y(\pi(X))).$$

Therefore, by second-order Taylor expansion around 0 and  $\beta = 1/\alpha$ , we have

$$\phi(\pi, \alpha) = \mathbf{E} [Y(\pi(X))] - \frac{\mathbf{Var} (Y(\pi(X)))}{2\alpha} - \alpha\delta + o(1/\alpha).$$

Then, the optimal solution is

$$\alpha^* = \sqrt{\frac{\mathbf{Var} (Y(\pi(X)))}{2\delta}} + o(1/\delta).$$

## Appendix A.5 Proof of Proposition 4.1

We first show the upper bound of empirical optimal dual variable for both direct and stable formulations.

**Lemma A4.** *Let the empirical optimal dual variables  $\hat{\alpha}_n$  and  $\hat{\alpha}_n^{\text{stable}}$  be defined as  $\hat{\alpha}_n = \arg \max_{\alpha \geq 0} \{\hat{\phi}_n(\pi, \alpha)\}$  and  $\hat{\alpha}_n^{\text{stable}} = \arg \max_{\alpha \geq 0} \{\hat{\phi}_n^{\text{stable}}(\pi, \alpha)\}$ , respectively. Suppose that Assumption 1 is imposed, we have*

$$\hat{\alpha}_n \leq \frac{M}{\log(S_n^\pi) + \delta} \text{ and } \hat{\alpha}_n^{\text{stable}} \leq \frac{M}{\delta},$$

if  $\log(S_n^\pi) + \delta > 0$ .

*Proof.* Notice that we have

$$\lim_{\alpha \rightarrow 0} -\alpha \log \hat{W}_n(\pi, \alpha) - \alpha\delta \geq \min_{i \in \{1, 2, \dots, n\}} (Y_i) \geq 0, \text{ and } \lim_{\alpha \rightarrow 0} -\alpha \log \hat{W}_n^{\text{stable}}(\pi, \alpha) - \alpha\delta \geq 0.$$

In fact, in view of the following inequalities

$$-\alpha \log \hat{W}_n(\pi, \alpha) - \alpha\delta \leq M - \alpha \log(S_n^\pi) - \alpha\delta, \text{ and } -\alpha \log \hat{W}_n^{\text{stable}}(\pi, \alpha) - \alpha\delta \leq M - \alpha\delta,$$

we have the desired results. □

*Proof of Proposition 4.1.* Notice that

$$\hat{Q}_{DRO}^{\text{stable}}(\pi) = \sup_{\alpha \geq 0} \left\{ -\alpha \log \hat{W}_n(\pi, \alpha) - \alpha\delta + \alpha \log(S_n^\pi) \right\}.$$

By Lemma A4, if  $S_n^\pi > \exp(-\delta/2)$ , we have

$$\hat{\alpha}_n \leq \frac{2M}{\delta} \text{ and } \hat{\alpha}_n^{\text{stable}} \leq \frac{M}{\delta}.$$

and further

$$\left| \hat{Q}_{DRO}^{\text{stable}}(\pi) - \hat{Q}_{DRO}(\pi) \right| \leq \frac{2M}{\delta} \log(S_n^\pi).$$

Notice that  $|\log(x)| \leq 2|x-1|$  when  $x \geq \frac{1}{4}$ . Hence, we have when  $S_n^\pi \geq \frac{1}{4}$ .

$$\left| \hat{Q}_{DRO}^{\text{stable}}(\pi) - \hat{Q}_{DRO}(\pi) \right| \leq \frac{4M}{\delta} |S_n^\pi - 1|. \quad (\text{A.3})$$

Recall that  $S_n^\pi = \sum_{i=1}^n \frac{\mathbf{1}\{\pi(X_i)=A_i\}}{\pi_0(A_i|X_i)}$  with  $\mathbf{E} \left[ \frac{\mathbf{1}\{\pi(X_i)=A_i\}}{\pi_0(A_i|X_i)} \right] = 1$  and  $\frac{\mathbf{1}\{\pi(X_i)=A_i\}}{\pi_0(A_i|X_i)} \in [0, 1/\eta]$ . By Hoeffding's inequality (see, for example, Theorem 2.8 in [3]), we have

$$\mathbf{P}(|S_n^\pi - 1| > t) \leq 2 \exp(-2\eta^2 t^2 n).$$

for  $t > 0$ . Let  $t = \log(2/\epsilon) / (\sqrt{2n\eta})$  and  $t < 1 - \max\{1/4, \exp(-\delta/2)\}$ , which is equivalent to

$$n > (\log(2/\epsilon) / (1 - \max\{1/4, \exp(-\delta/2)\}) / \eta)^2 / 2.$$

Finally, when  $n > \frac{1}{2} \left( \frac{\log(2/\epsilon)}{(1 - \max\{1/4, \exp(-\delta/2)\})\eta} \right)^2$ , with probability  $1 - \epsilon$ , we obtain

$$\left| \hat{Q}_{DRO}^{\text{stable}}(\pi) - \hat{Q}_{DRO}(\pi) \right| \leq \frac{2\sqrt{2}M \log(2/\epsilon)}{\delta\eta \sqrt{n}}.$$

□

## References

- [1] Aloisio Araujo and Evarist Giné. *The central limit theorem for real and Banach valued random variables*. John Wiley & Sons, 1980.
- [2] J Frédéric Bonnans and Alexander Shapiro. *Perturbation analysis of optimization problems*. 2000.
- [3] S. Boucheron, G. Lugosi, and P. Massart. *Concentration Inequalities: A Nonasymptotic Theory of Independence*. Oxford University Press, 2013.
- [4] Ioannis Chatzigeorgiou. Bounds on the lambert function and their application to the outage analysis of user cooperation. *IEEE Communications Letters*, 17(8):1505–1508, 2013.
- [5] Louis Faury, Ugo Tanielian, Flavian Vasile, Elena Smirnova, and Elvis Dohmatob. Distributionally robust counterfactual risk minimization. *arXiv preprint arXiv:1906.06211*, 2019.
- [6] Alexander Shapiro, Darinka Dentcheva, and Andrzej Ruszczyński. *Lectures on stochastic programming: modeling and theory*. SIAM, 2009.
- [7] Aad W. van der Vaart. *Asymptotic Statistics*. Number 3. Cambridge Univ Pr, 2000.
